# Supplementary material for: The Role of Viral Introductions in Sustaining Community-Based HIV Epidemics in Rural Uganda: Evidence from Spatial Clustering, Phylogenetics, and Egocentric Transmission Models
Source: PubMed Central journal article supplement (PMC3942316; doi:10.1371/journal.pmed.1001610), 2014-03-04

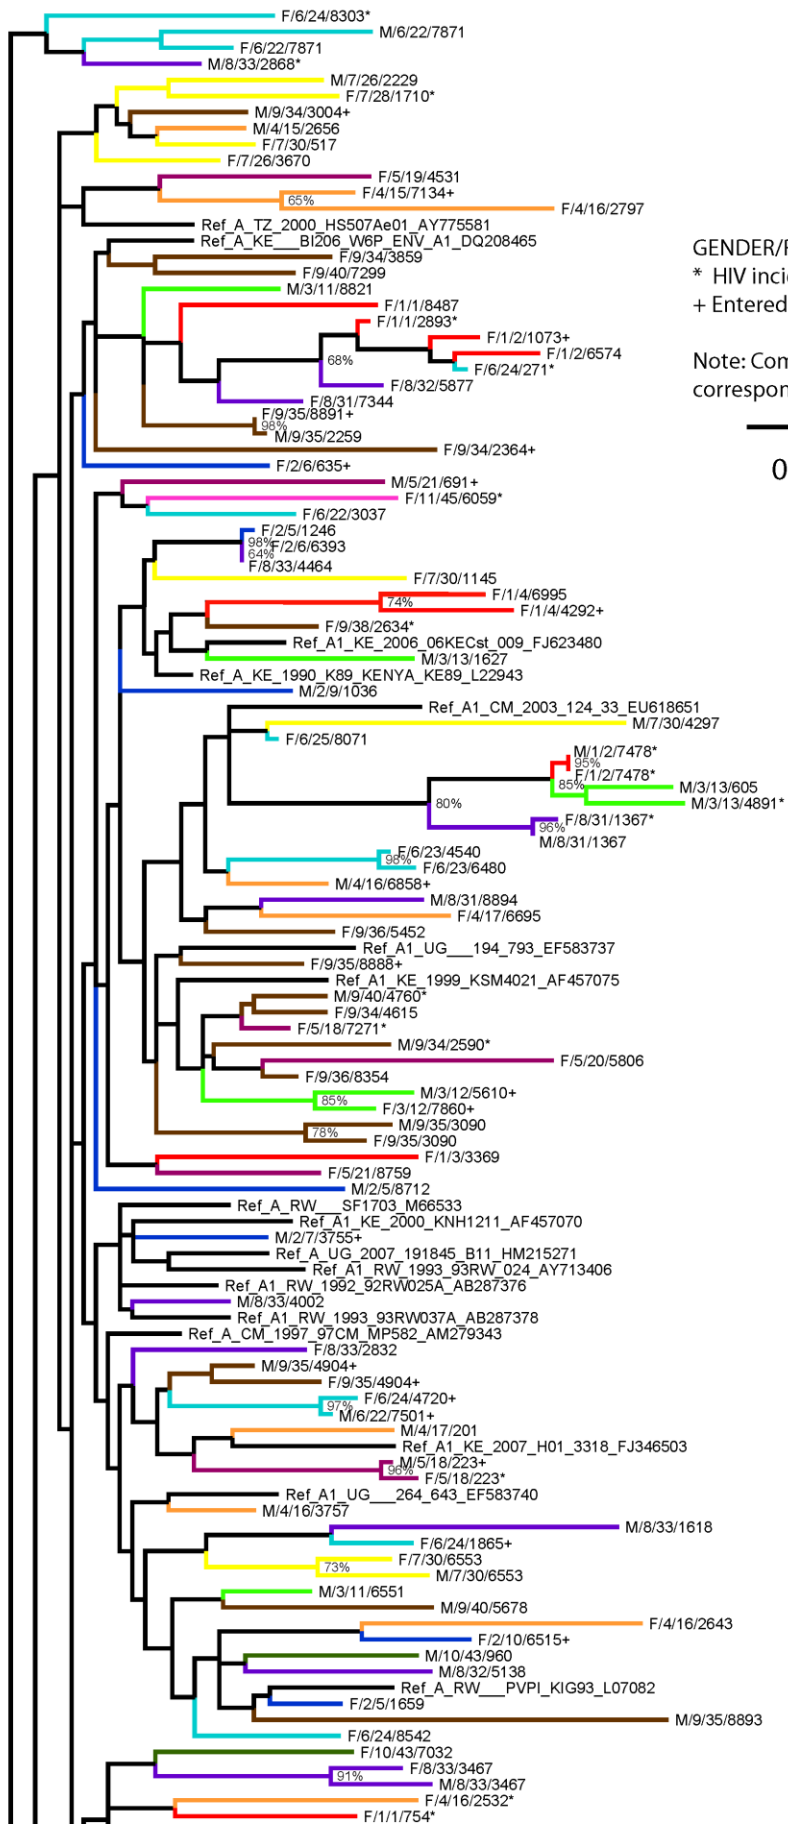

GENDER/REGION/COMMUNITY/HOUSEHOLD

\* HIV incident case, 2008-2009

+ Entered into study HIV seropositive, 2008-2009

Note: Community and household indicators do not correspond to RCCS indicators (see legend).

0.02

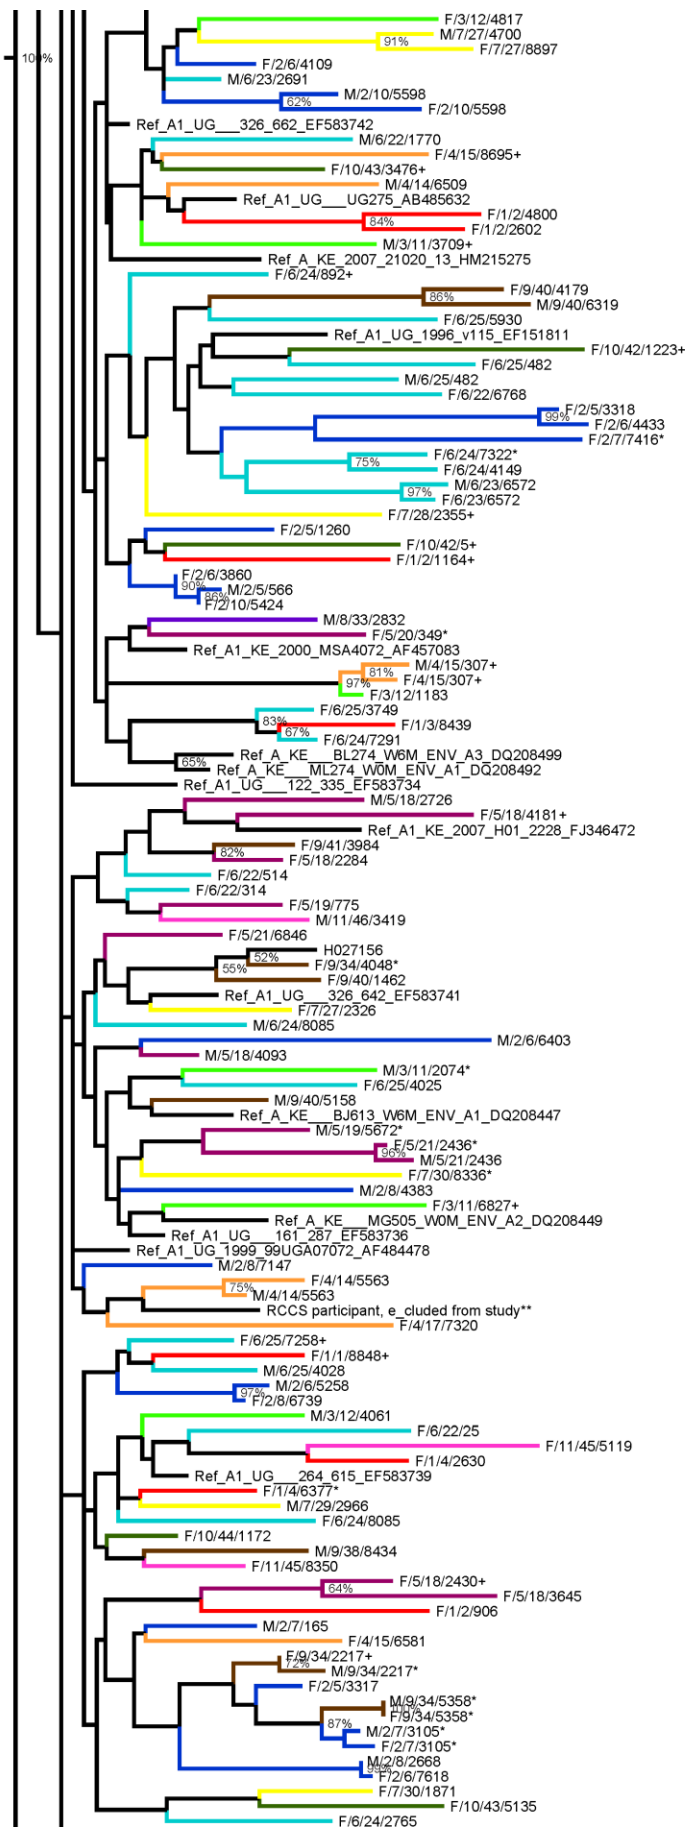

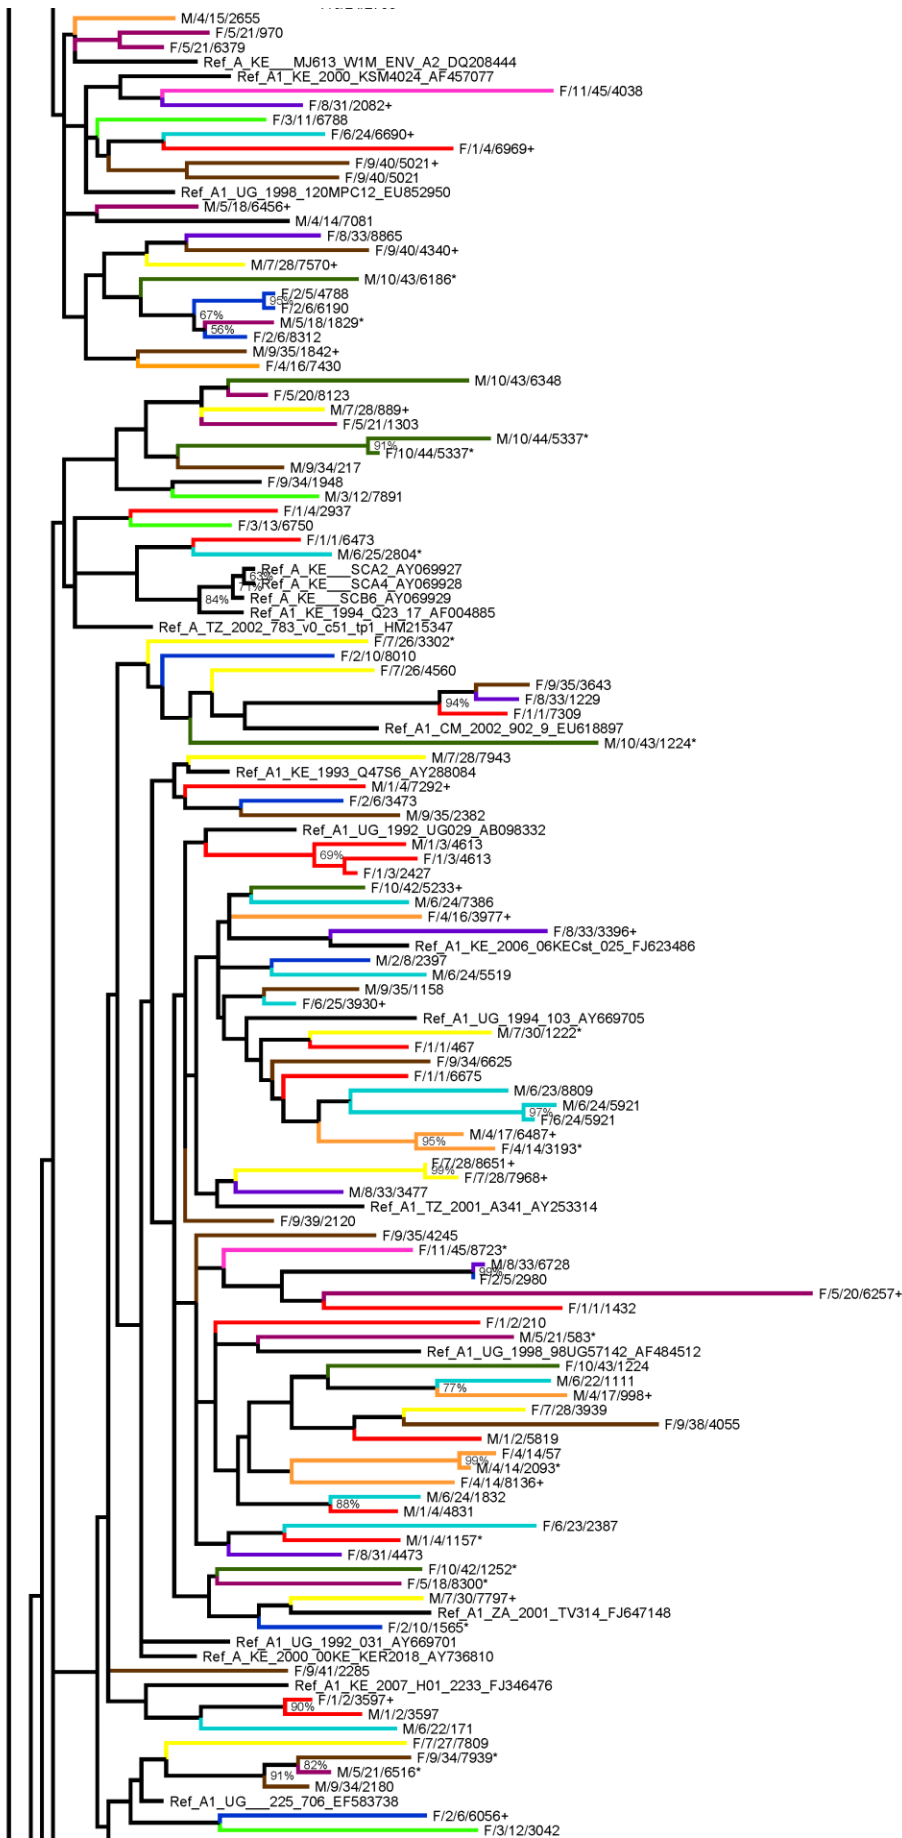

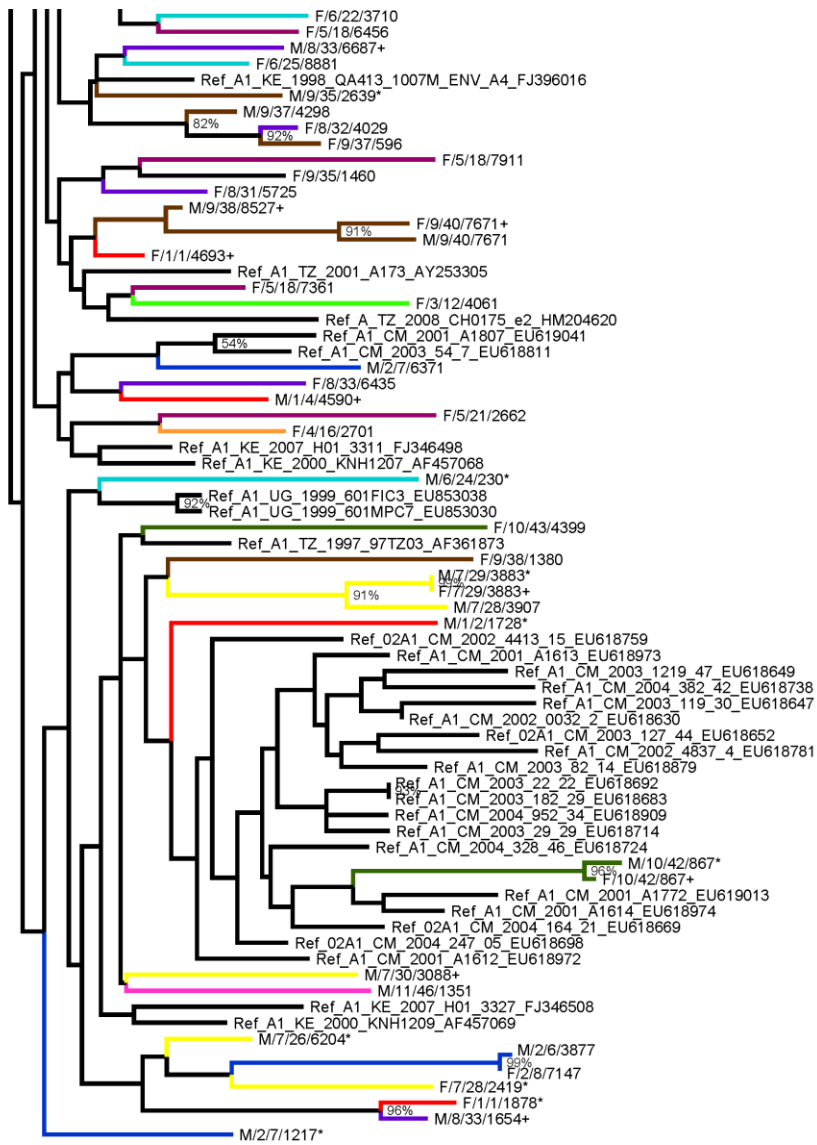

Supplement: pmed.1001610.s010.pdf [file pmed.1001610.s010.pdf]
